# Supplementary material for: An integrated insight into the response of bacterial communities to anthropogenic contaminants in a river: A case study of the Wonderfonteinspruit catchment area, South Africa
Source: PubMed Central journal article supplement (PMC6528982; doi:10.1371/journal.pone.0216758), 2019-05-21
Supplement: pone.0216758.s005.pdf [file pone.0216758.s005.pdf]

1 **S1 Table. Summary of the sampling area, anthropogenic activities performed in the lower WFS and associated contaminants.**

| Site | Location      | Coordinates                  | Activity                                                                                                         | Type of pollution                                                                                                                                                                                                                                                                                                                   | Contaminants                                                                                                                                                                                                                                                           |
|------|---------------|------------------------------|------------------------------------------------------------------------------------------------------------------|-------------------------------------------------------------------------------------------------------------------------------------------------------------------------------------------------------------------------------------------------------------------------------------------------------------------------------------|------------------------------------------------------------------------------------------------------------------------------------------------------------------------------------------------------------------------------------------------------------------------|
| 1    | Carletonville | -26.31583333,<br>27.38247222 | <ul style="list-style-type: none"> <li>- Gold mining</li> <li>- Urban</li> <li>- Informal settlements</li> </ul> | <ul style="list-style-type: none"> <li>- Point discharge of mine effluents (fissure &amp; process water) via pipelines &amp; canals</li> <li>- Point discharge of wastewater from municipal sewage works upstream of Carletonville</li> <li>- Diffuse sources of pollution (e.g. storm runoff) from informal settlements</li> </ul> | <ul style="list-style-type: none"> <li>- Heavy metals (uranium, chromium, cobalt, nickel, copper, arsenic, cadmium, zinc)</li> <li>- Microbial pathogens</li> <li>- Salts</li> <li>- Nutrients</li> <li>- Phosphorus</li> <li>- Nitrogen, Nitrate, Ammonium</li> </ul> |
| 2    | Wolverdiend   | -26.3671944,<br>27.2705833   | <ul style="list-style-type: none"> <li>- Gold mining</li> <li>- Urban</li> <li>- Informal settlements</li> </ul> | <ul style="list-style-type: none"> <li>- Point discharge of mine effluents (fissure &amp; process water) via pipelines &amp; canals</li> <li>- Point discharge of wastewater from Wolverdiend municipal sewage works</li> <li>- Diffuse sources of pollution (e.g. storm runoff) from informal settlements</li> </ul>               | <ul style="list-style-type: none"> <li>- Heavy metals (uranium, chromium, cobalt, nickel, copper, arsenic, cadmium, zinc)</li> <li>- Microbial pathogens</li> <li>- Salts</li> <li>- Nutrients</li> <li>- Phosphorus</li> <li>- Nitrogen, Nitrate, Ammonium</li> </ul> |
| 3    | C2H069        | -26.3700278,<br>27.2493889   | Gold mining                                                                                                      | <ul style="list-style-type: none"> <li>- Point discharge of mine effluents (fissure &amp; process water) via pipelines &amp; canals</li> <li>- Point discharge of wastewater from Wolverdiend municipal</li> </ul>                                                                                                                  | <ul style="list-style-type: none"> <li>- Heavy metals (uranium, chromium, cobalt, nickel, copper, arsenic, cadmium, zinc)</li> <li>- Microbial pathogens</li> </ul>                                                                                                    |

|   |                           |                         |             |                                                                                                                                                                                                                                                                                                                    |                                                                                                                                                                                                                                                                                                     |
|---|---------------------------|-------------------------|-------------|--------------------------------------------------------------------------------------------------------------------------------------------------------------------------------------------------------------------------------------------------------------------------------------------------------------------|-----------------------------------------------------------------------------------------------------------------------------------------------------------------------------------------------------------------------------------------------------------------------------------------------------|
|   |                           |                         |             | sewage works                                                                                                                                                                                                                                                                                                       | <ul style="list-style-type: none"> <li>– Nutrients</li> <li>– Phosphorus</li> <li>– Nitrogen, Nitrate, Ammonium</li> </ul>                                                                                                                                                                          |
| 4 | Turffontein dolomitic eye | -26.4095, 27.177417     | Agriculture | <ul style="list-style-type: none"> <li>– Diffuse pollution via seepage of fertilizers from irrigated crop areas</li> <li>– Point &amp; diffuse uranium pollution of groundwater sources by re-occurring short-term events (e.g. rain storms, floods, discharge events, accidental mine effluent spills)</li> </ul> | <ul style="list-style-type: none"> <li>– Heavy metals (uranium, chromium, cobalt, nickel, copper, arsenic, cadmium, zinc)</li> <li>– Microbial pathogens</li> <li>– Salts</li> <li>– Nutrients</li> <li>– Phosphorus</li> <li>– Nitrate, Ammonium, Nitrogen oxides</li> <li>– Pesticides</li> </ul> |
| 5 | Muiskraal                 | -26.4364722, 27.1514167 | Agriculture | <ul style="list-style-type: none"> <li>– Diffuse pollution via seepage of fertilizers from irrigated crop areas</li> <li>– Point &amp; diffuse uranium pollution of groundwater sources by re-occurring short-term events (e.g. rain storms, floods, discharge events, accidental mine effluent spills)</li> </ul> | <ul style="list-style-type: none"> <li>– Heavy metals (uranium, chromium, cobalt, nickel, copper, arsenic, cadmium, zinc)</li> <li>– Microbial pathogens</li> <li>– Salts</li> <li>– Nutrients</li> <li>– Phosphorus</li> <li>– Nitrate, Ammonium, Nitrogen oxides</li> <li>– Pesticides</li> </ul> |
| 6 | Gerhard Minnebron         | -26.4798056,            | Agriculture | <ul style="list-style-type: none"> <li>– Diffuse pollution via seepage of</li> </ul>                                                                                                                                                                                                                               | <ul style="list-style-type: none"> <li>– Heavy metals (uranium,</li> </ul>                                                                                                                                                                                                                          |

|   |                       |                           |             |                                                                                                                                                                            |                                                                                                                         |
|---|-----------------------|---------------------------|-------------|----------------------------------------------------------------------------------------------------------------------------------------------------------------------------|-------------------------------------------------------------------------------------------------------------------------|
|   | dolomitic eye         | 27.1516111                |             | fertilizers from irrigated crop areas                                                                                                                                      | chromium, cobalt, nickel, copper, arsenic, cadmium, zinc)                                                               |
|   |                       |                           |             | – Point & diffuse uranium pollution of groundwater sources by re-occurring short-term events (e.g. rain storms, floods, discharge events, accidental mine effluent spills) | – Microbial pathogens<br>– Salts<br>– Nutrients<br>– Phosphorus<br>– Nitrate, Ammonium, Nitrogen oxides<br>– Pesticides |
| 7 | Mooi River confluence | -26.514555,<br>27.1245278 | Agriculture | – Diffuse pollution via seepage of fertilizers from irrigated crop areas                                                                                                   | – Microbial pathogens<br>– Salts<br>– Nutrients<br>– Phosphorus<br>– Nitrate, Ammonium, Nitrogen oxides<br>– Pesticides |
